# Supplementary material
Source: PubMed Central journal article supplement (PMC10097475)
Supplement: 10-1055-a-2016-7417-s202210cr0278.pdf [file 10-1055-a-2016-7417-s202210cr0278.pdf]

**Supplemental Table S1** Cost breakdown of tablet loaner program

| Description                                                        | Unit cost per family (\$) | Total (\$) |
|--------------------------------------------------------------------|---------------------------|------------|
| LG G Pad X 8.3 VK815 (Includes wall charger and power cable)       | 89.99 (fixed)             | 9,988.89   |
| Shipping (delivery to patient residence and return, if applicable) | 15.00 (fixed)             | 1,665      |
| Includes Verizon mobile device management and SIM card             | 253.20 (annual)           | 28,105.20  |
|                                                                    |                           | 39,759.09  |

**Supplemental Table S2** Change in completed virtual visits, by specialty

|                                      | Preintervention                      |                  | Intervention                         |                  |
|--------------------------------------|--------------------------------------|------------------|--------------------------------------|------------------|
|                                      | Visits completed, n (% of scheduled) | Visits scheduled | Visits completed, n (% of scheduled) | Visits scheduled |
| Psychiatry/mental health             | 372 (83.5)                           | 445              | 637 (85.7)                           | 743              |
| Other subspecialty care <sup>a</sup> | 140 (78.6)                           | 178              | 193 (82.1)                           | 235              |
| Primary care                         | 146 (70.1)                           | 208              | 164 (74.5)                           | 220              |
| Adolescent medicine                  | 57 (83.8)                            | 68               | 92 (82.8)                            | 111              |
| Gastroenterology                     | 39 (88.6)                            | 44               | 71 (81.6)                            | 87               |
| Genetics                             | 7 (100)                              | 7                | 54 (90)                              | 60               |
| Nutrition                            | 27 (87)                              | 31               | 37 (80.4)                            | 46               |
| Other <sup>b</sup>                   | 47 (73.4)                            | 64               | 34 (75.5)                            | 45               |
| PT/OT/speech                         | 72 (85.7)                            | 84               | 28 (77.7)                            | 36               |
| Neurology                            | 19 (79.1)                            | 24               | 28 (82.3)                            | 34               |

Abbreviations: OT, occupational therapy; PT, physical therapy.

<sup>a</sup>Includes allergy, anesthesia, cardiology, dermatology, developmental medicine, general surgery, gynecology, hematology, infectious diseases, neonatology, nephrology, neurophysiology, obesity, ophthalmology, orthopedics, otolaryngology, plastic Surgery, pulmonology, rheumatology, sports medicine, and urology.

<sup>b</sup>Includes audiology, dentistry, optometry, and social work.
